# Supplementary material
Source: HighWire-hosted journal article supplement (https://fg.bmj.com/highwire/filestream/143924/field_highwire_adjunct_files/1/flgastro-2022-102157supp002_data_supplement.pdf)
Supplement: flgastro-2022-102157supp002_data_supplement.pdf [file flgastro-2022-102157supp002_data_supplement.pdf]

## Supplementary file 2

**List delivery**

Contractual methods used by services in outsourcing and insourcing (January – December 2020). Values refer to percentages of services that use a particular method. \*Percentages add up to over 100 as multiple methods may have been used

| <b>Contractual method</b>             | <b>Outsource*</b> | <b>Insource*</b> |
|---------------------------------------|-------------------|------------------|
| Ongoing contract for regular activity | 26 (28.6%)        | 36 (36.7%)       |
| Contract to reduce long waits         | 48 (52.7%)        | 64 (65.3%)       |
| Ad-hoc arrangement?                   | 26 (28.6%)        | 21 (21.4%)       |

**Administrators**

Administrator employment and vacancy rate per service. WTE = whole time equivalent.

| <b>Role</b>                            | <b>Median (IQR) WTE per service</b> | <b>Vacancy rate (% of vacancy out of total desired pool) Mean (SD)</b> |
|----------------------------------------|-------------------------------------|------------------------------------------------------------------------|
| Band 8                                 | 0 (0 - 1)                           | 4.2 ± 18.2%                                                            |
| Band 7 - senior administrator/ manager | 0 (0 - 1)                           | 4.1 ± 16.4%                                                            |
| Band 6 - senior administrator/ manager | 0 (0 - 1)                           | 6.1 ± 22.1%                                                            |
| Band 5 - administrator/ supervisor     | 0.5 (0 - 1)                         | 5.3 ± 20.0%                                                            |
| Band 4 - admin team leader             | 1 (0 - 1.2)                         | 6.5 ± 19.7%                                                            |
| Band 3 - admin booker scheduler        | 2 (1 - 4.4)                         | 8.3 ± 18.0%                                                            |
| Band 2 - admin support/ receptionist   | 1 (0 - 3)                           | 7.3 ± 18.3%                                                            |

**Training**

Service and training lists for trainees, defined by primary role.

| <b>Role</b>                                                                        | <b>Service lists per week median (IQR)</b> | <b>Training lists per week median (IQR)</b> |
|------------------------------------------------------------------------------------|--------------------------------------------|---------------------------------------------|
| Gastroenterology specialist trainees (ST/SPRs)                                     | 1 (0 - 2)                                  | 2 (1 - 4)                                   |
| Surgical specialist trainees (ST/SPRs)                                             | 0 (0 - 1)                                  | 2 (1 - 3)                                   |
| Other medical trainees (e.g. radiology, research fellows, non-consultant trainees) | 0 (0 - 0)                                  | 0 (0 - 1)                                   |
| Trainee clinical endoscopists                                                      | 0 (0 - 1)                                  | 1 (0 - 2)                                   |

## DNA and cancellation

| <b>Year</b> | <b>DNA rate (%)</b> |     | <b>List cancellations (n)</b> |     |
|-------------|---------------------|-----|-------------------------------|-----|
|             | Standard            | BCS | Standard                      | BCS |

## Supplementary file 2

|             |                 |                 |                 |                |
|-------------|-----------------|-----------------|-----------------|----------------|
| <b>2021</b> | 3.18% (SD 6.2)  | 0.25% (SD 1.1)  | 27.86 (SD 64.8) | 1.04 (SD 3.4)  |
| <b>2019</b> | 3.48% (SD 3.07) | 1.33% (SD 2.81) | 5.01 (SD 12.11) | 0.86 (SD 2.39) |

DNA (did not attend) rate and cancelled lists in March 2021 compared to March 2019. BCS = bowel cancer screening

**Safety**

| <b>Incident type</b>                        | <b>Number of services reporting</b> | <b>%</b> |
|---------------------------------------------|-------------------------------------|----------|
| Equipment incident                          | 95                                  | 29.60%   |
| Documentation or reporting incident         | 83                                  | 25.90%   |
| Histology and sampling incident             | 51                                  | 15.90%   |
| Drug incident                               | 41                                  | 12.80%   |
| Infection control (COVID related)           | 39                                  | 12.10%   |
| Workforce/ skill mix                        | 31                                  | 9.70%    |
| Sedation, IV access and monitoring incident | 30                                  | 9.30%    |
| Consent incident                            | 20                                  | 6.20%    |
| Technical skills                            | 13                                  | 4.00%    |
| Training incident                           | 6                                   | 1.90%    |

% of services that reported incident type in March 2021
